# Supplementary material for: Performance of a brief geriatric evaluation compared to a comprehensive geriatric assessment for detection of geriatric syndromes in family medicine: a prospective diagnostic study
Source: Springer Nature journal article supplement (doi:10.1186/s12877-018-0761-z), 2018-03-13
Supplement: MOESM1 [file 15531378]

## Additional file 1

Cross-tabulation of brief assessment tool results, by result of comprehensive geriatric assessment

|                               | Geriatrician |          |            |
|-------------------------------|--------------|----------|------------|
| Family practitioner           |              |          |            |
| Functional dependency (N=83)  | Little       | Moderate | Important  |
| - Little                      | 68           | 1        | 0          |
| - Moderate                    | 3            | 7        | 2          |
| - Important                   | 0            | 1        | 1          |
| Cognitive disorder (N=83)     | None         | Possible | Certain    |
| - None                        | 39           | 8        | 1          |
| - Possible                    | 18           | 9        | 1          |
| - Certain                     | 1            | 1        | 5          |
| Clock test (N=78)             | Normal       | Limit    | Pathologic |
| - Normal                      | 58           | 3        | 4          |
| - Limit                       | 4            | 0        | 0          |
| - Pathologic                  | 4            | 1        | 4          |
| Mood disorder (N=85)          | None         | Possible | Certain    |
| - None                        | 34           | 7        | 4          |
| - Possible                    | 14           | 5        | 6          |
| - Certain                     | 5            | 6        | 4          |
| Walking disorder (N=84)       | None         | Light    | Severe     |
| - None                        | 37           | 5        | 0          |
| - Light                       | 19           | 11       | 2          |
| - Severe                      | 1            | 5        | 4          |
| Falls during past year (N=81) | No           | Yes      |            |
| - No                          | 48           | 8        |            |
| - Yes                         | 8            | 17       |            |
| Risk of falls (N=81)          | Low          | Moderate | High       |
| - Low                         | 39           | 8        | 1          |
| - Moderate                    | 11           | 9        | 4          |
| - High                        | 3            | 4        | 2          |
| Osteoporosis (N=77)           | No           | Yes      |            |
| - No                          | 27           | 8        |            |
| - Yes                         | 14           | 28       |            |
| Undernutrition (N=81)         | Absent       | At risk  | Present    |
| - Absent                      | 50           | 18       | 0          |
| - At risk                     | 5            | 3        | 1          |
| - Present                     | 2            | 0        | 2          |

|                                       |        |         |        |
|---------------------------------------|--------|---------|--------|
| Visual impairment (N=83)              | None   | Light   | Severe |
| - None                                | 11     | 11      | 0      |
| - Light                               | 13     | 38      | 5      |
| - Severe                              | 0      | 2       | 3      |
| Hearing impairment (N=82)             | None   | Light   | Severe |
| - None                                | 37     | 6       | 1      |
| - Light                               | 6      | 17      | 3      |
| - Severe                              | 0      | 7       | 5      |
| Urinary incontinence, any type (N=82) | Absent | Present |        |
| - Absent                              | 41     | 8       |        |
| - Present                             | 7      | 26      |        |
